# Supplementary material for: Extreme Environments Facilitate Hybrid Superiority – The Story of a Successful Daphnia galeata × longispina Hybrid Clone
Source: PLOS journal article supplement (doi:10.1371/journal.pone.0140275), 2015-10-08

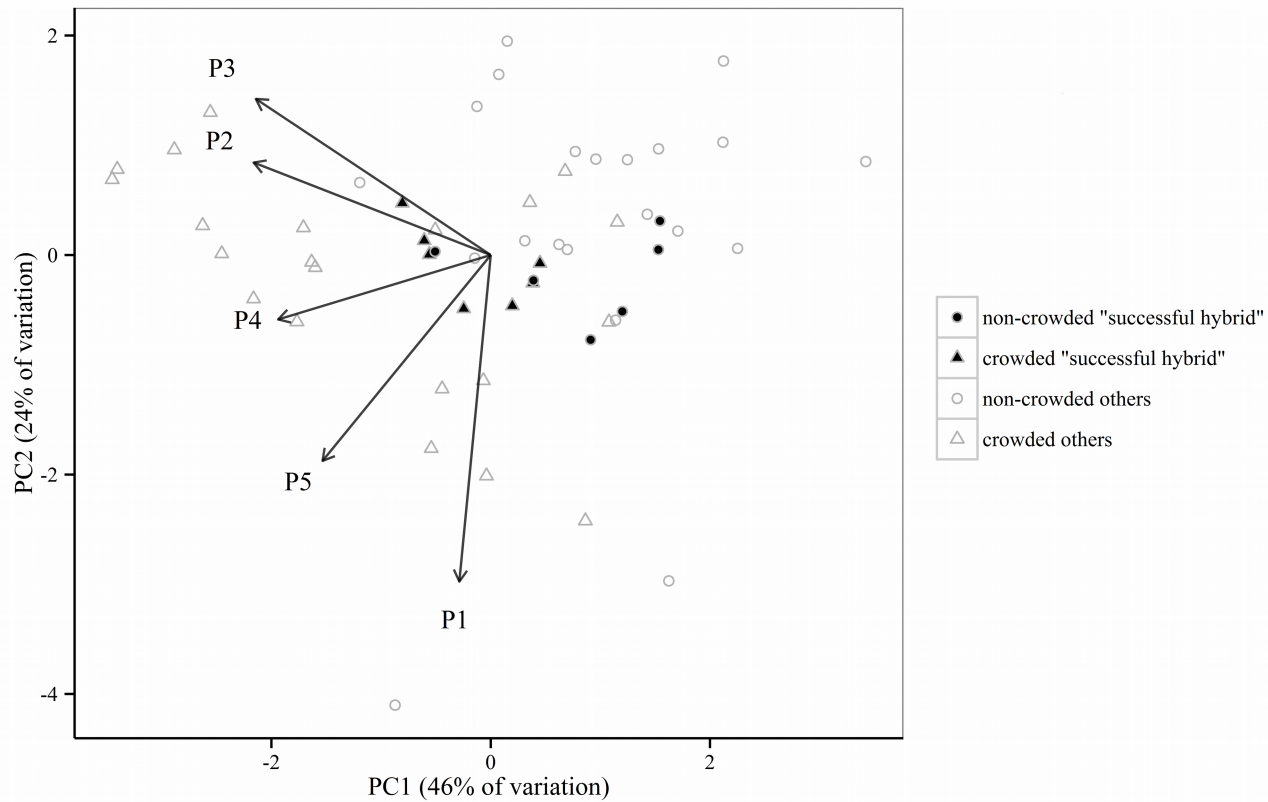

Supplement: S7 (10.1371/journal.pone.0140275.s007) [file journal.pone.0140275.s007]
